# Supplementary material
Source: PubMed Central journal article supplement (PMC8409594)
Supplement: jci-131-138276-s230.pdf [file jci-131-138276-s230.pdf]

**A**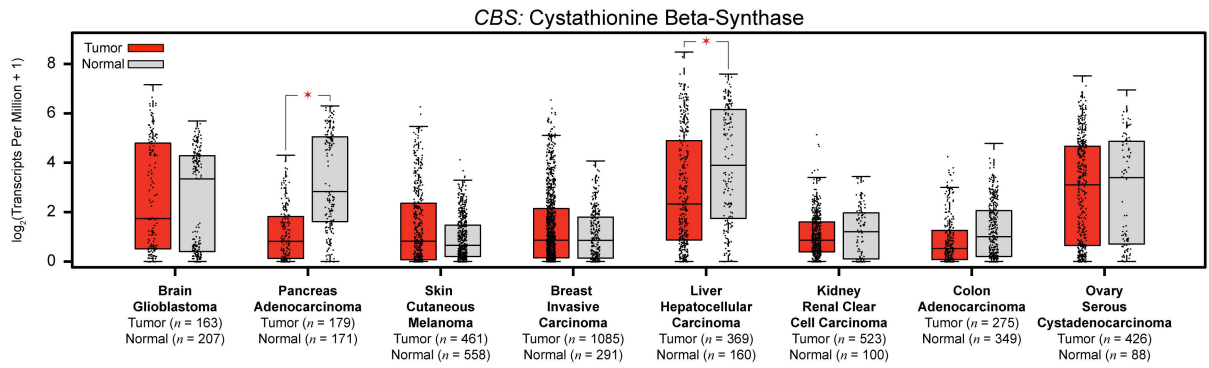**B**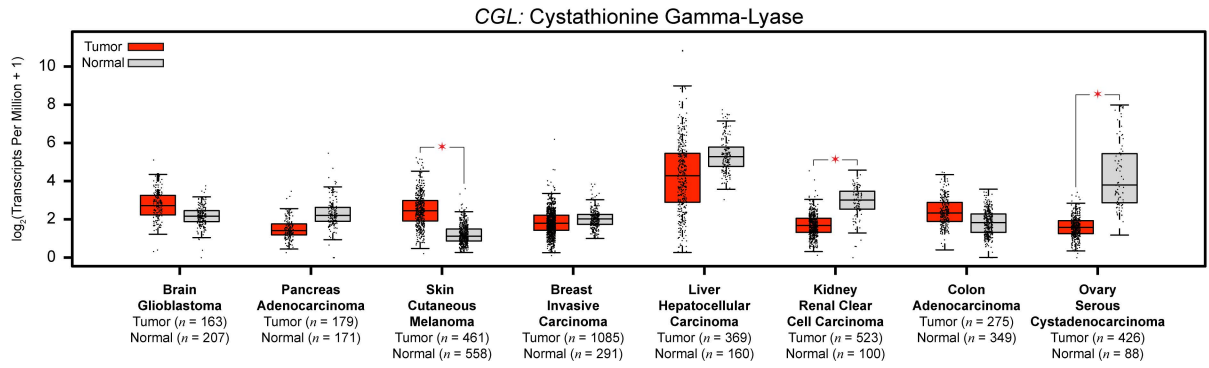**C**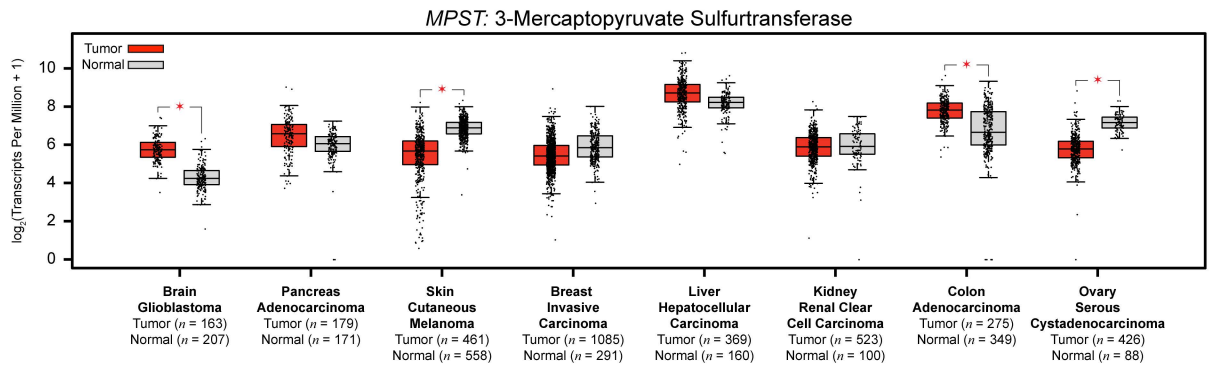

**Supplementary Figure 1.** *mRNA Expression Data Comparing Normal to Neoplastic Tissues Confirms Heterogeneous and Organ Specific Expression of the H<sub>2</sub>S Synthesizing Enzymes.* (A) CBS, (B) CGL, and (C) MPST. Data was curated and downloaded from the GEPIA dataset. The following solid organs and associated tumors were analyzed: (1) Normal brain *versus* GBM. (2) Normal pancreas *versus* pancreatic adenocarcinoma. (3) Normal skin *versus* cutaneous melanoma. (4) Normal breast *versus* invasive breast carcinoma. (5) Normal liver *versus* hepatocellular carcinoma. (6) Normal kidney *versus* clear cell renal carcinoma. (7) Normal colon *versus* colon adenocarcinoma. (8) Normal ovary *versus* serous ovarian cystic adenocarcinoma. Gene expression in the neoplastic state is designated in red as compared to the physiologically normal state, represented in gray. Statistically significant ( $p \leq 0.05$ ) differences in average gene expression were designated with red asterisks.

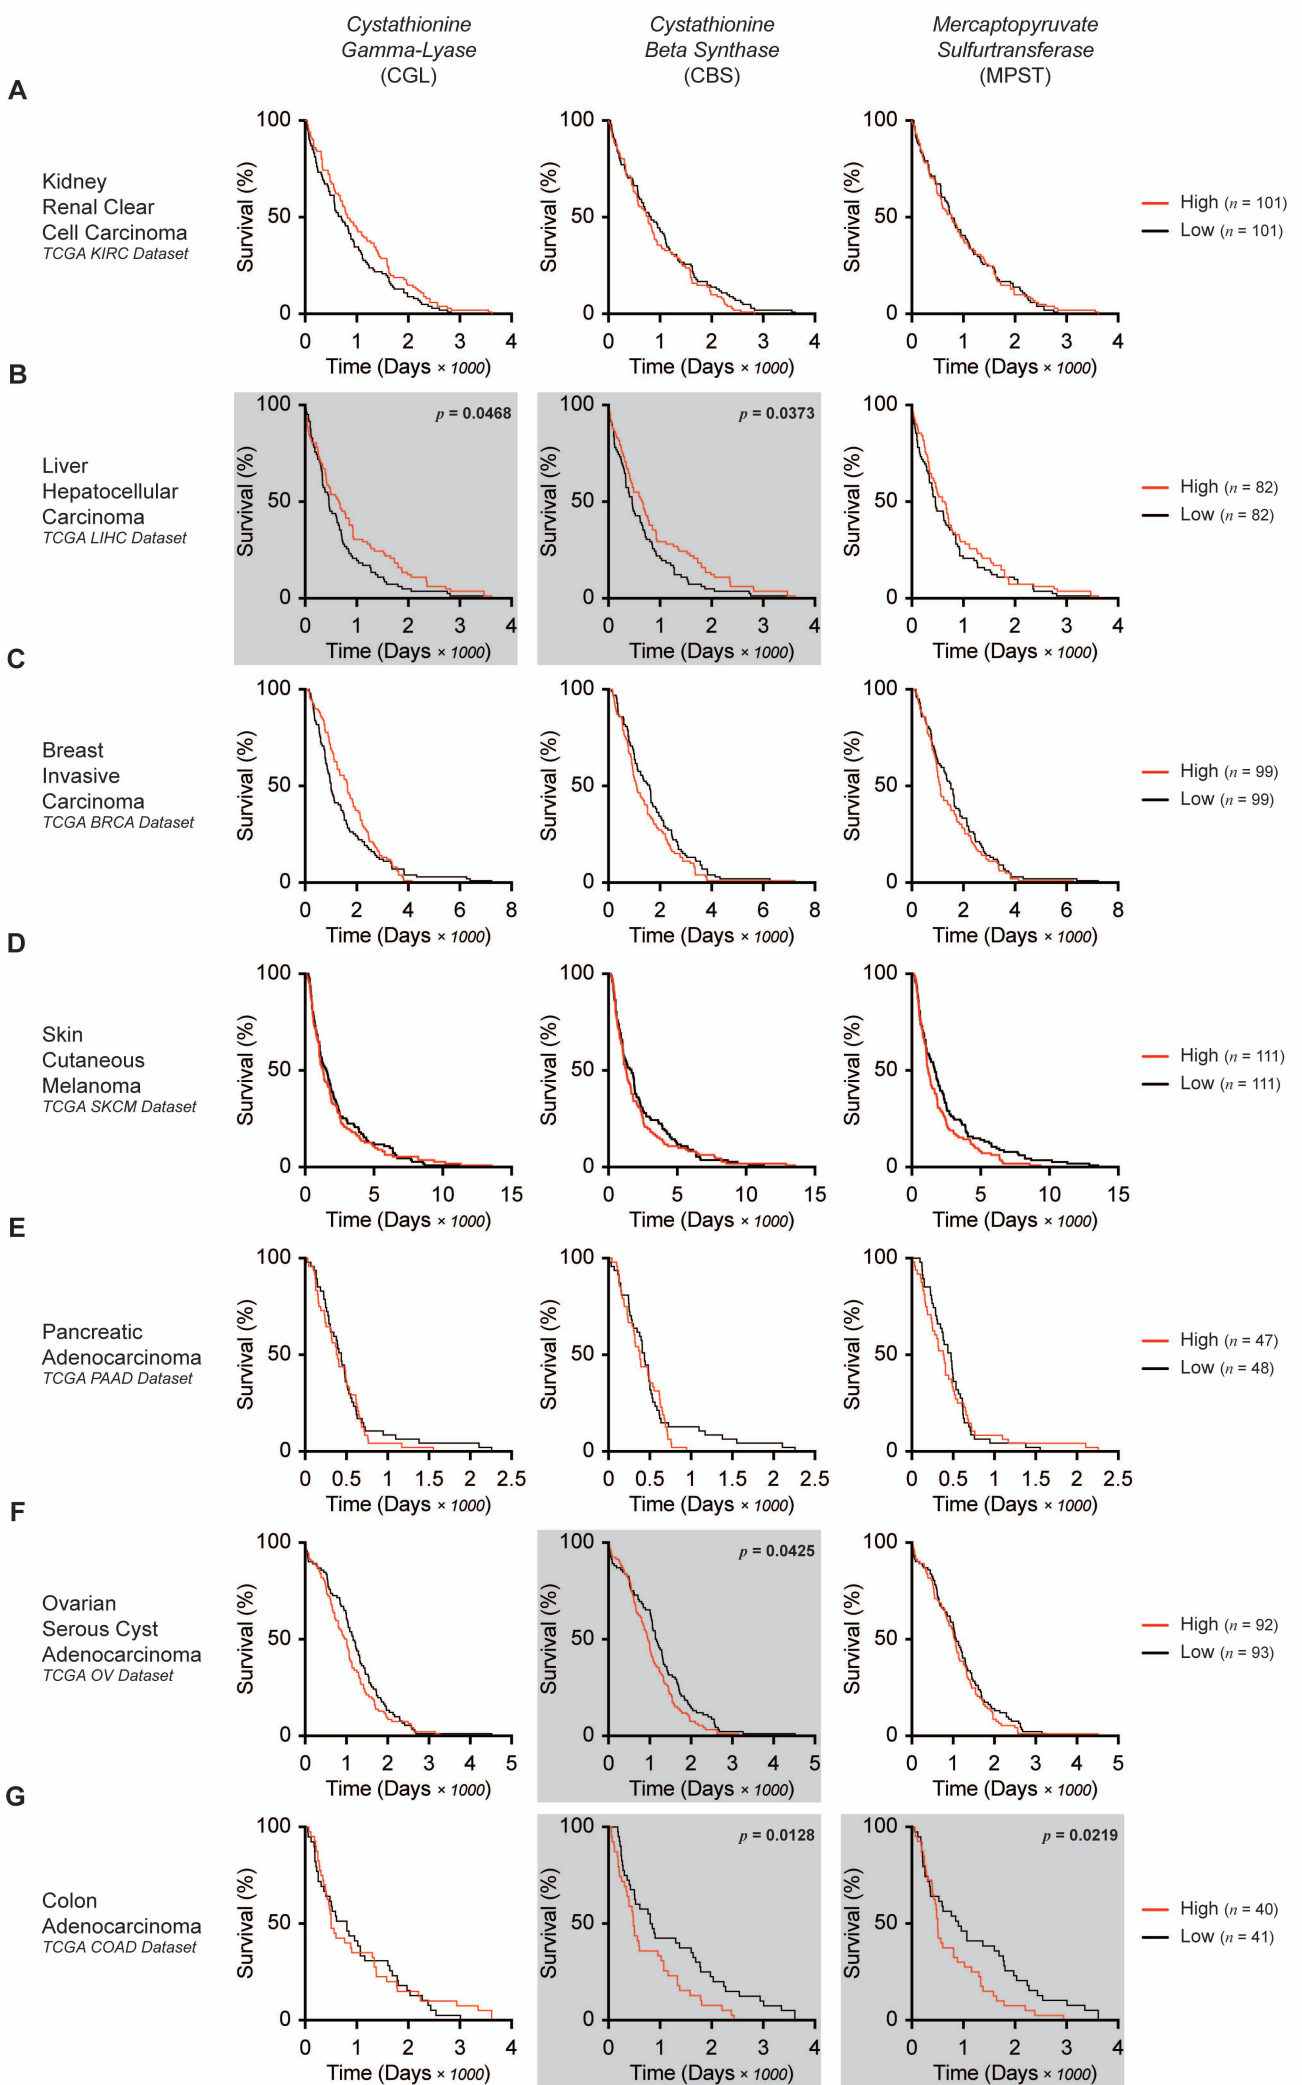

**Supplemental Figure 2.** *Kaplan-Meier Analysis of H<sub>2</sub>S-Synthesizing Enzymes in the Contexts of Multiple Solid Tissue Cancers.* The University of California Santa Cruz Genome Browser was used to filter, download, and analyze mRNA expression data correlated to patient survival for the following solid tissue cancers and associated datasets: (1) Renal clear cell adenocarcinoma; *KIRC Dataset*. (2) Hepatocellular carcinoma; *LIHC Dataset*. (3) Invasive breast carcinoma; *BRCA Dataset*. (4) Cutaneous melanoma; *SKCM Dataset*. (5) Pancreatic adenocarcinoma; *PAAD Dataset*. (6) Ovarian serous cystic adenocarcinoma; *OV Dataset*. (7) Colon adenocarcinoma; *COAD Dataset*. Median gene expression was used to differentiate between high and low expressing patients. Statistically significant ( $p \leq 0.05$ ) results in which enzyme expression predicted patient survival are highlighted in gray.

Body Composition Over Time:  
HFD versus Control Diet Fed Mice

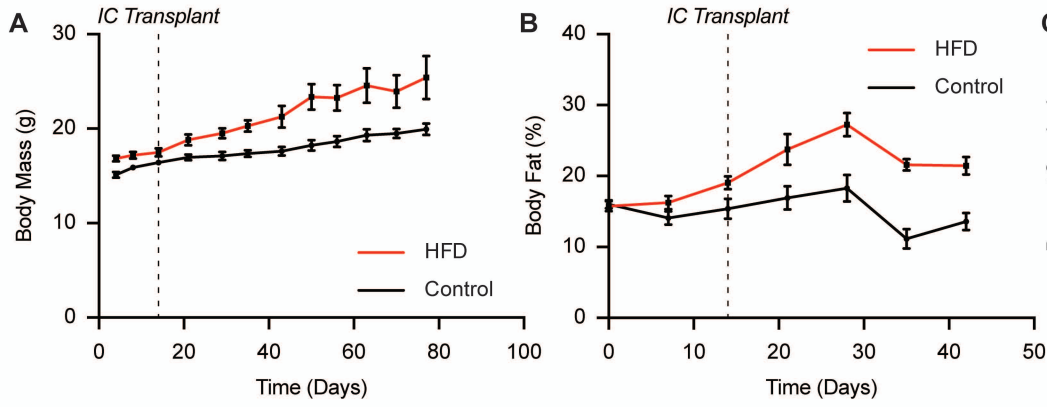

Survival of GBM-Bearing Mice  
HFD versus Control Diet

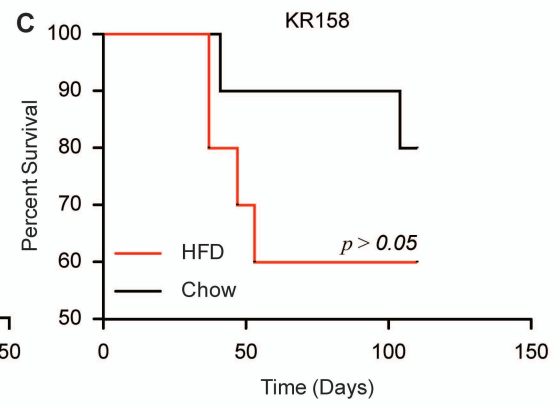

*hGBM 23 and hGBM 3691 In Vitro ± Oleic Acid*

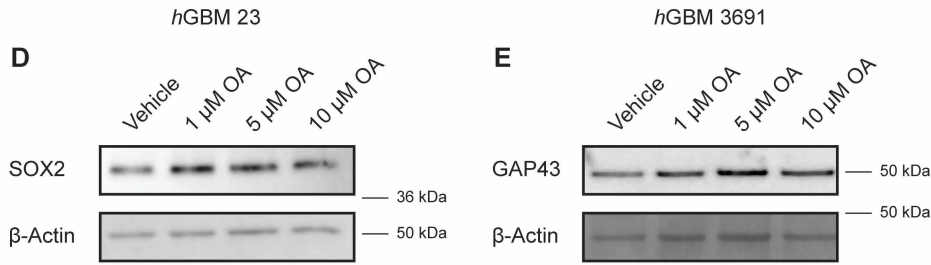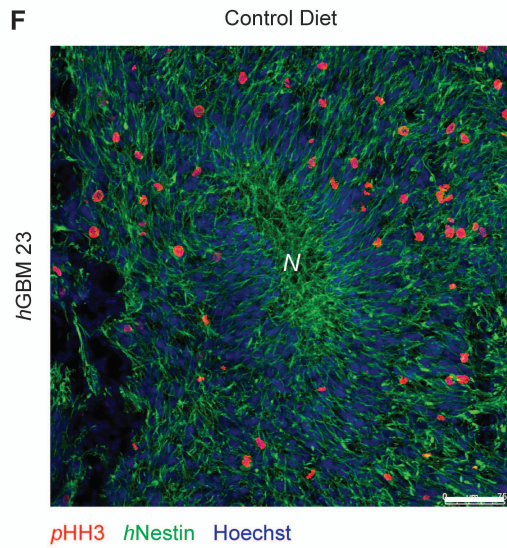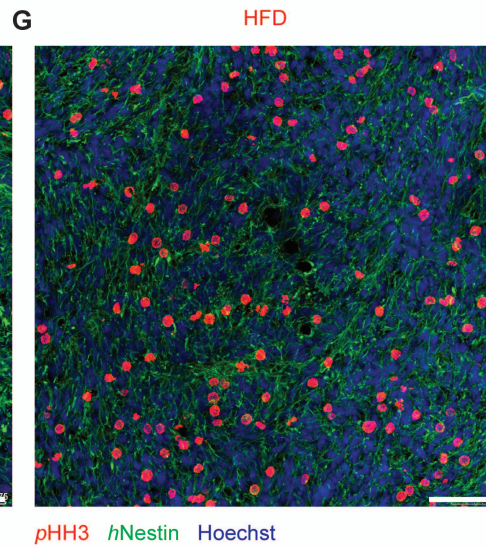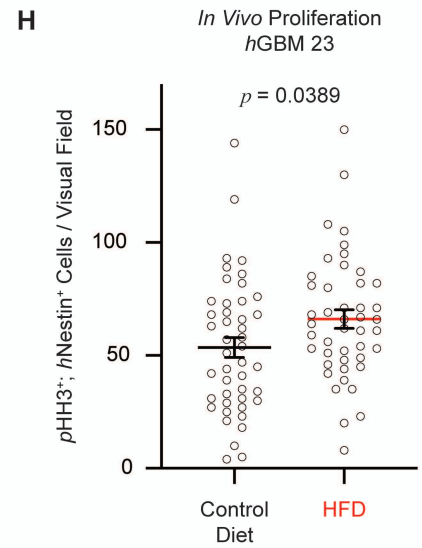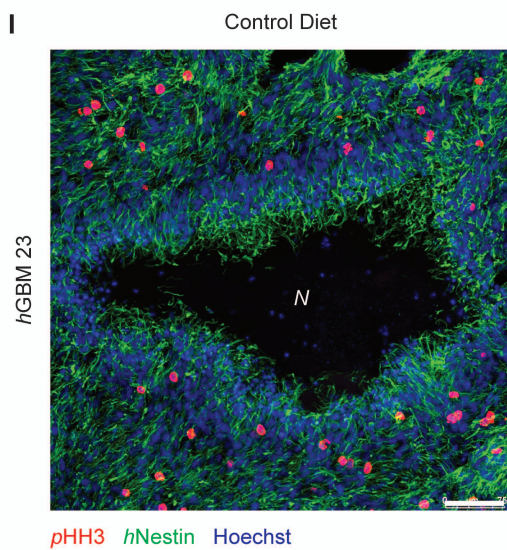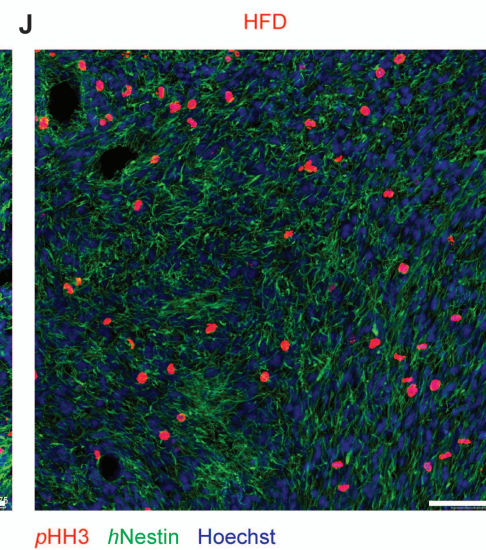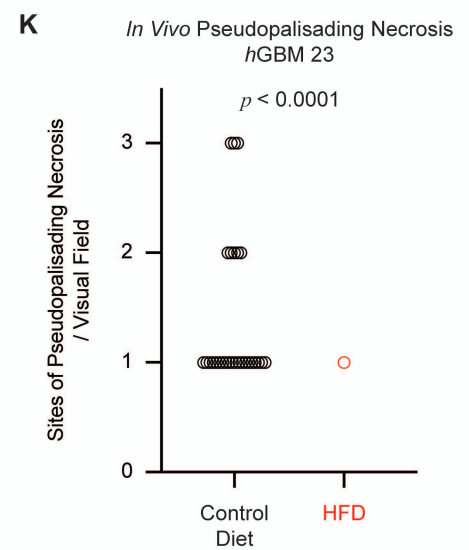

**Supplementary Figure 3.** *Obesogenic HFD Consumption Leads to Expansion of Treatment-Refractory CSCs, Increased Tumor Cell Proliferation, Protection from Necrotic Cell Death, and Truncated Overall Survival.* (A, B) Representative assessments of body mass and fat compositional changes over time as a function of HFD versus control diet consumption. Each in vivo experiment was tracked using these metrics beginning from the introduction of the differential diets throughout the post-transplantation period. (C) For any cell dosage, Kaplan-Meier survival analysis of the syngeneic GBM model KR158 demonstrated the expected pattern of HFD-mediated disease acceleration; however, statistical testing was confounded based on imperfect disease penetrance. Protein analysis of cultured, patient-derived GBM models demonstrates increased CSC-associated protein expression resulting from exposure to high-fat conditions. In two separate human GBM cellular models (*hGBM* 23 and *hGBM* 3691), administration of oleic acid resulted in dose-responsive expression increases of (D) SOX2 and (E) GAP43, respectively, compared to vehicle control conditions. In both cases, maximal CSC marker expression resulted from treatment with 5  $\mu$ M oleic acid. Representative experiments from three biological replicates are presented. Comparative immunofluorescence analysis of the GBM tumor microenvironment confirms increased tumor cell proliferation in the context of HFD consumption compared to consumption of a control diet (F – H). Further, sites of pseudopalisading necrosis were more prevalent in animals fed the control diet compared to those fed the HFD (F and I – K). From 45 images, captured from 3 animals per diet, one necrotic site was identified within the HFD group, whereas 39 sites were identified under control conditions. Mitotic tumor cells were visualized using phospho-histone H3 (*pHH3*, red) multiplexed with human-specific nestin (*hNestin*, green). Nuclei were visualized with Hoechst (blue). Scale bar = 75  $\mu$ m. *N* designates sites of pseudopalisading necrosis.

**A**

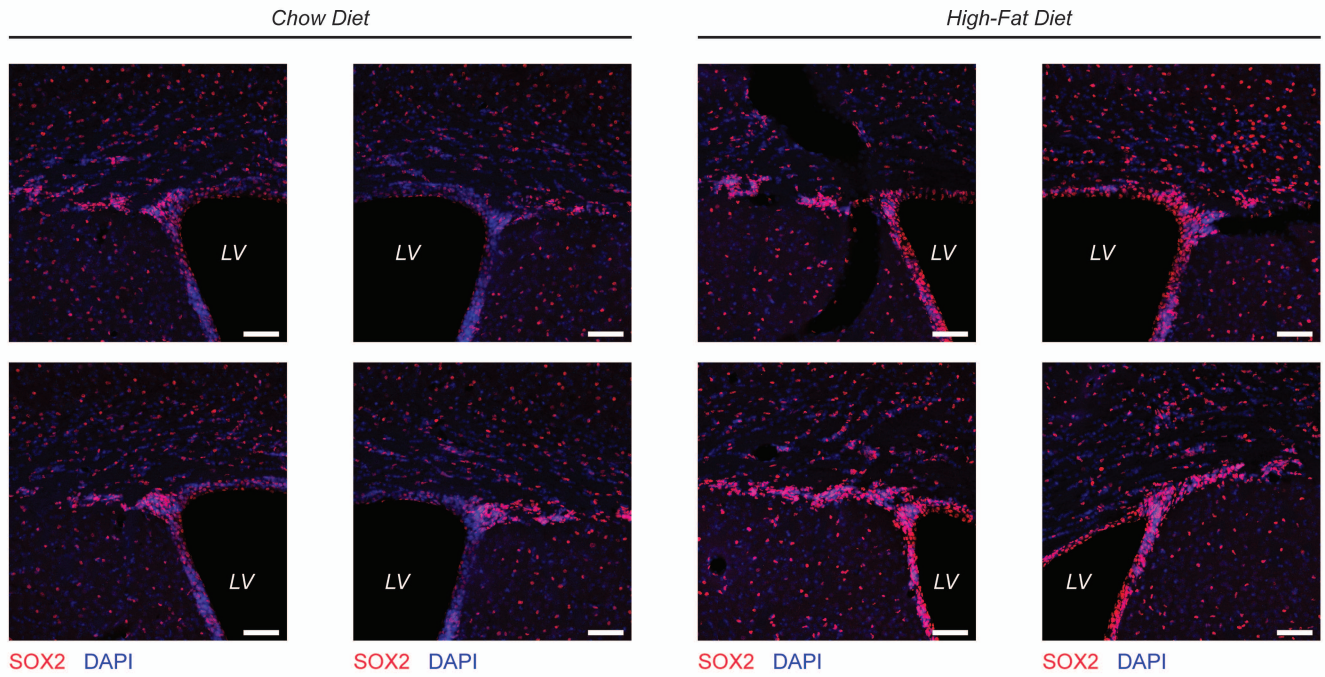

**B**

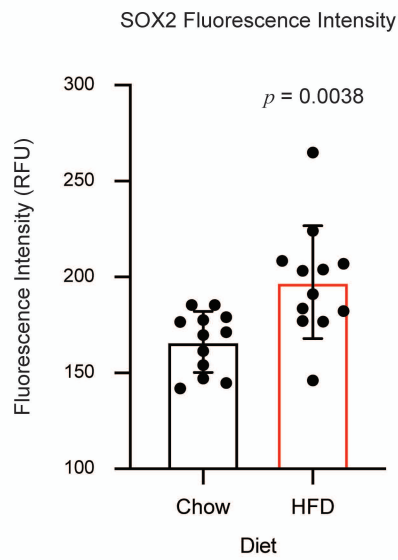

**C**

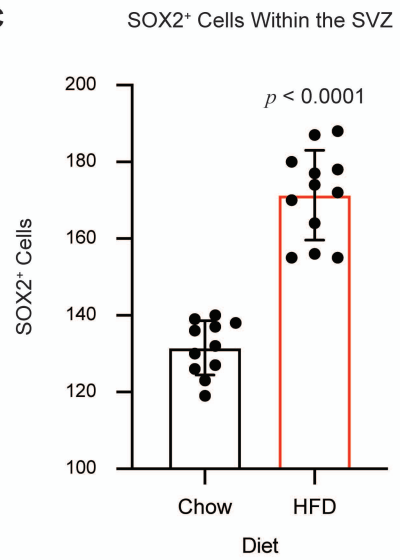

**Supplementary Figure 4.** *The HFD-Fed Brain Fosters Expansion of the Neural Stem and Progenitor Cell Pool within the Subventricular Zone.* (A) Representative bilateral immunofluorescent micrographs of the subventricular germinal zone of HFD- versus chow-fed mice. The neural stem cell-associated transcription factor SOX2 was visualized in red, and nuclei were visualized in blue using DAPI. A total of 12 representative images were captured from a total of 3 animals per group. Quantification based on (B) SOX2 fluorescence intensity or (C) direct counting of nucleated SOX2<sup>+</sup> cells confirmed expansion of the NSPC population under HFD-fed conditions compared to control diet. *p* values determined by unpaired t-test.



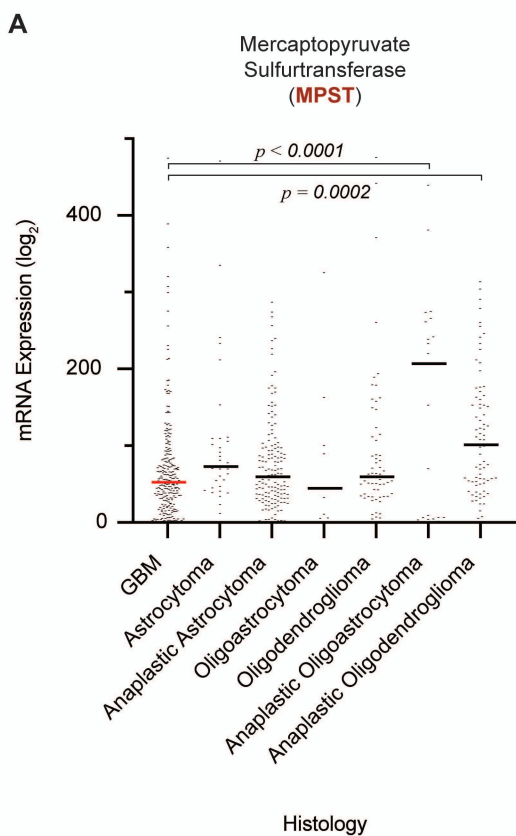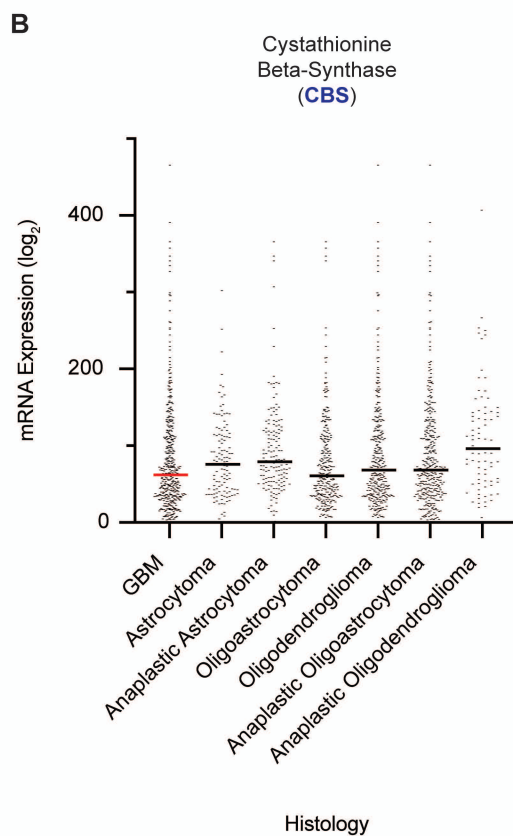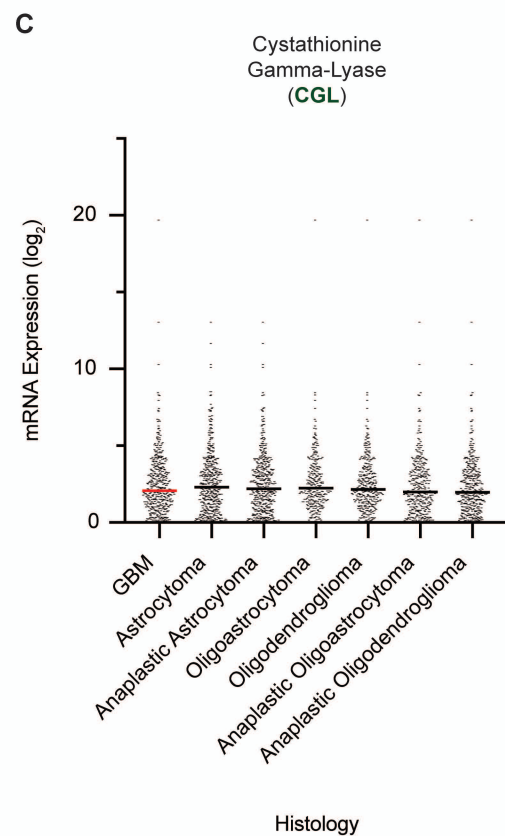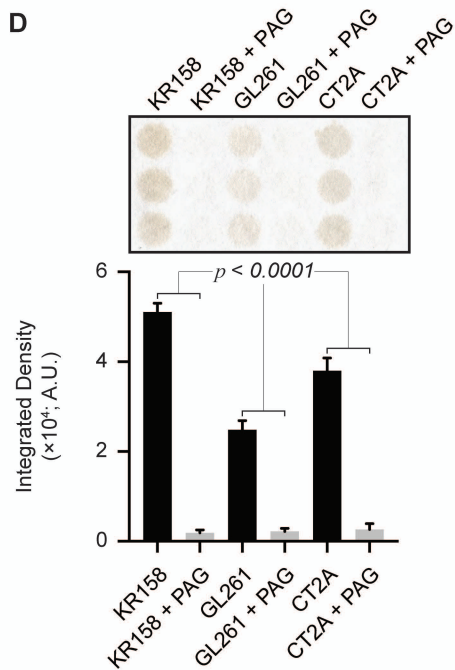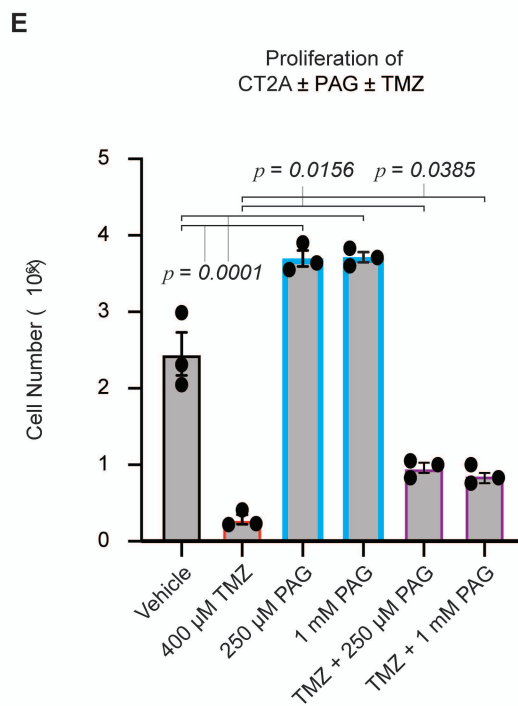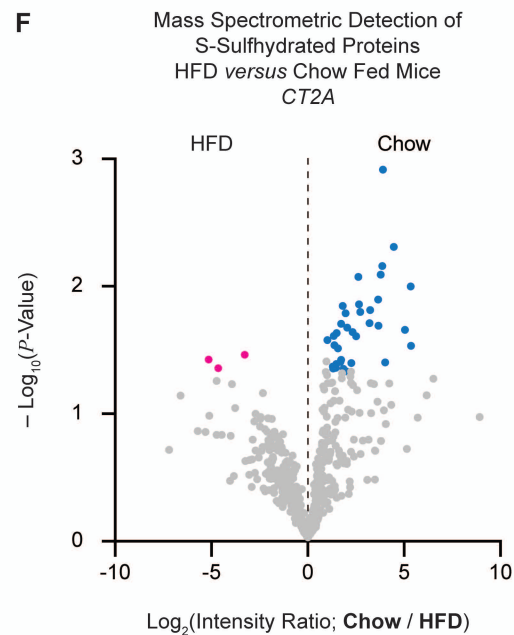

**Supplementary Figure 5.** *Inhibition of H<sub>2</sub>S Synthesis Drives Tumor Cell Proliferation and Chemotherapy Resistance.* (A – C) mRNA expression data curated by The CGGA of the three H<sub>2</sub>S-synthesizing enzymes, MPST, CBS, and CGL, demonstrate that patients with GBM present the lowest average expression of MPST and CBS compared to patients with other tumor types within the glioma family. (D) In vitro verification that the CGL inhibitor PAG effectively attenuates H<sub>2</sub>S production from the syngeneic GBM models KR158, GL261, and CT2A. Each well contains lysate from separate biological replicates. For a given cellular model, the *p* value was determined using an unpaired t-test. (E) Direct cell counting verifies that H<sub>2</sub>S inhibition increases tumor cell proliferation and resistance to the standard-of-care chemotherapeutic temozolomide (TMZ). Data represent mean ± SEM. *p* value determined using one-way ANOVA and Tukey's multiple comparison test. (F) Volcano plot representing the global analysis of the S-sulfhydrated protein landscape in CT2A tumor-bearing mice fed *either* a HFD *or* a control chow diet.

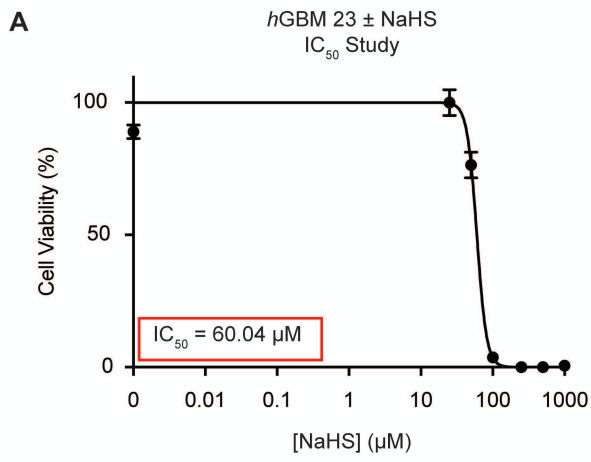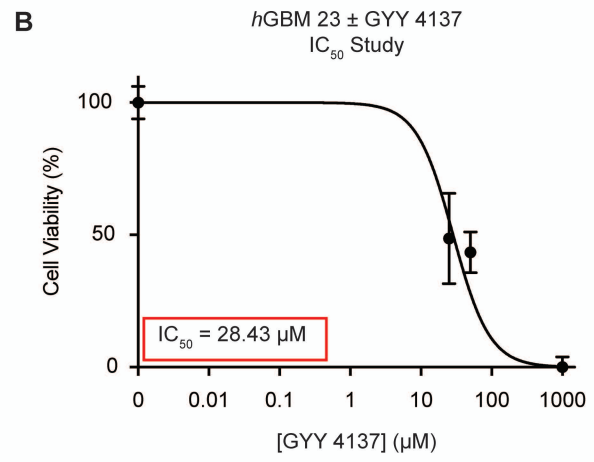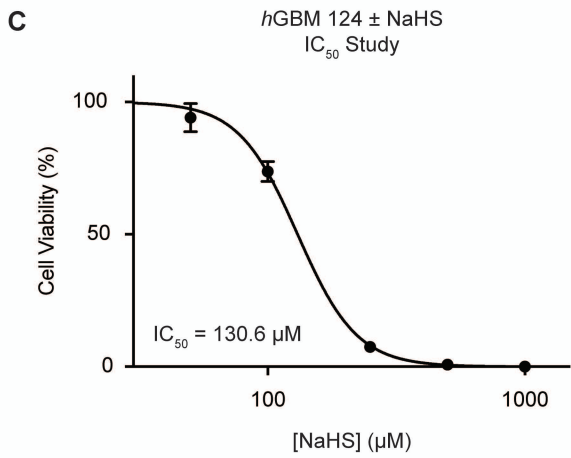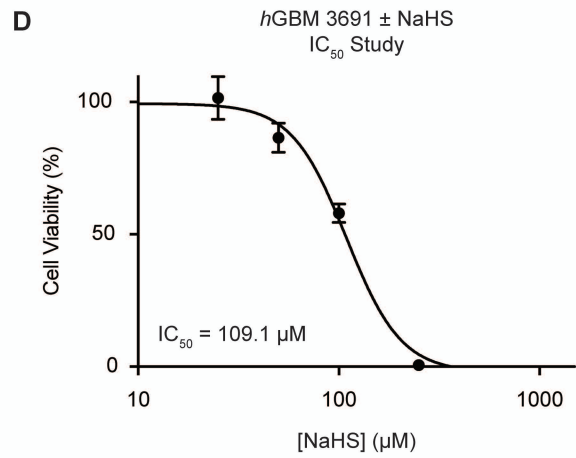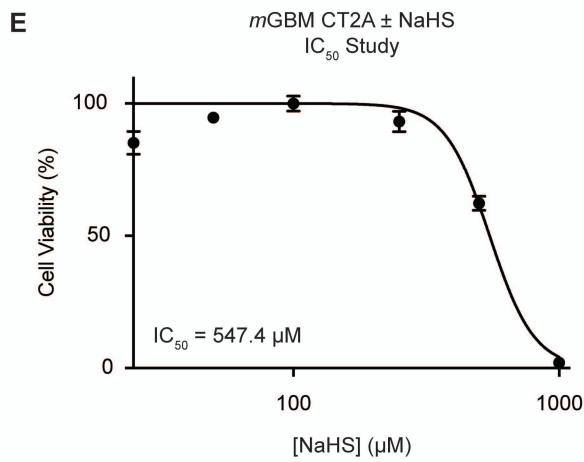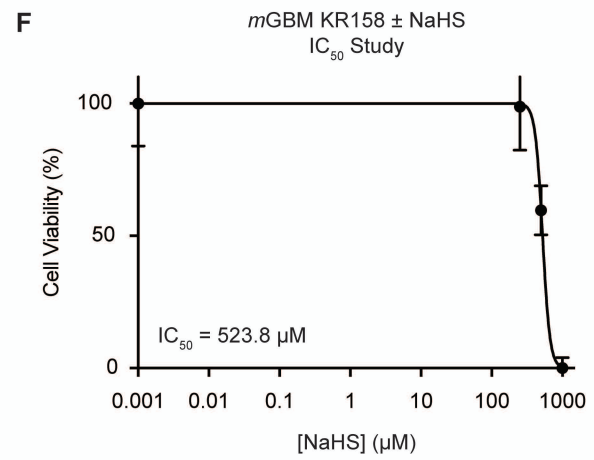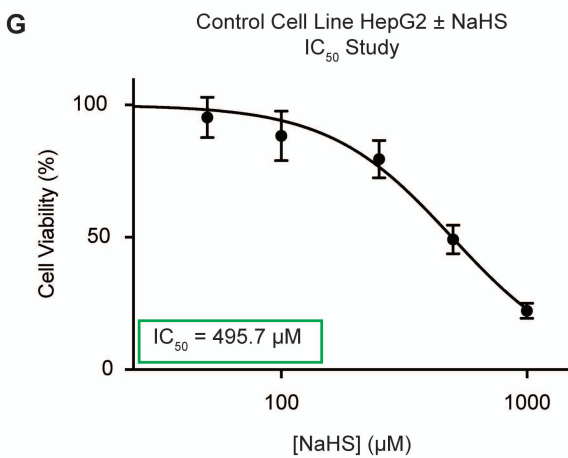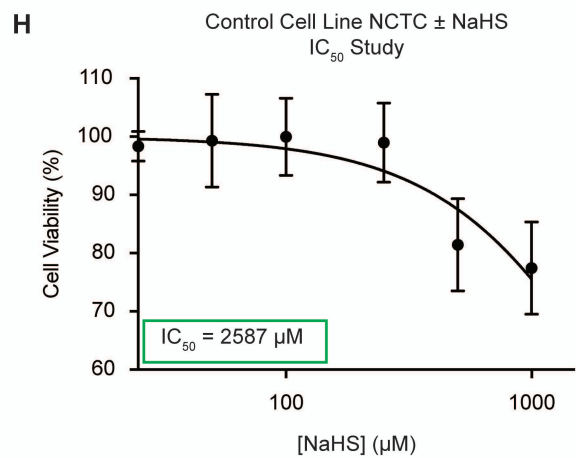

**Supplementary Figure 6.** *In Vitro Treatment with Exogeneous H<sub>2</sub>S Leads to Decreased Viability of GBM Tumor Cells.* Viability in the context of the chemical H<sub>2</sub>S donors NaHS and GYY 4137 was tested using the CellTiter-Glo Luminescent Cell Viability Assay. Luminescence was measured after 3 days of treatment with the following concentrations of H<sub>2</sub>S donors supplemented into normal growth media: 0.001 μM, 25 μM, 50 μM, 100 μM, 250 μM, 500 μM, and 1000 μM. Five technical replicates were examined per concentration, and each experiment was repeated in triplicate. We observed a stark division in IC<sub>50</sub> values between the human GBM models (**A – D**) (*hGBM* 23, *hGBM* 124, and *hGBM* 3691), the syngeneic GBM models (**E, F**) (CT2A and KR158) and the control epithelial cancer lines (**G, H**) (HepG2 and NCTC 1469).

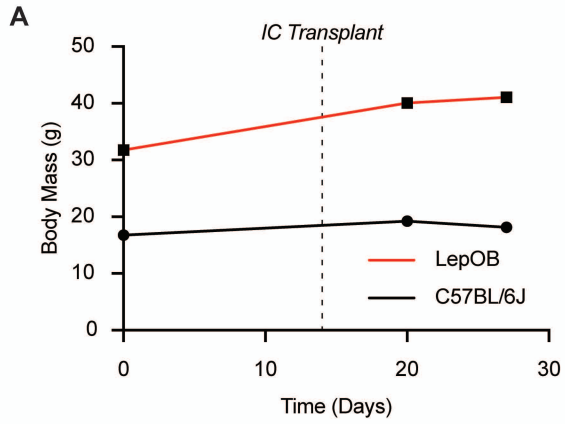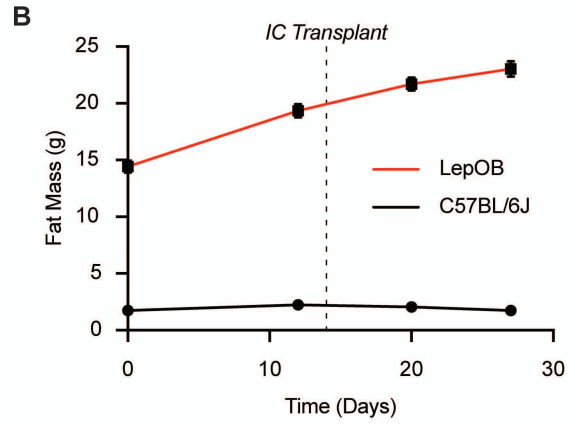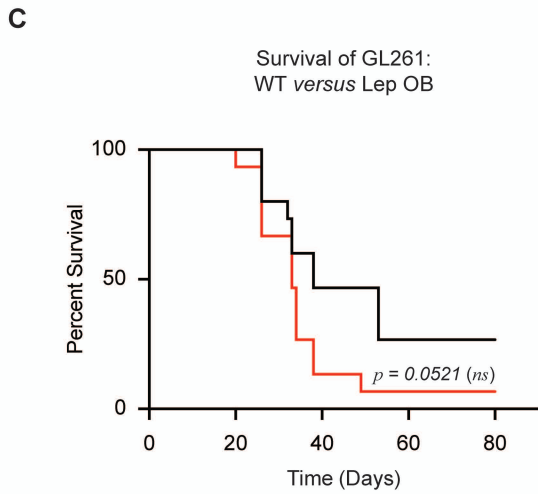

Median Survival (Days)

— C57BL/6 38

— Lep OB 33

$n = 15$  / Group

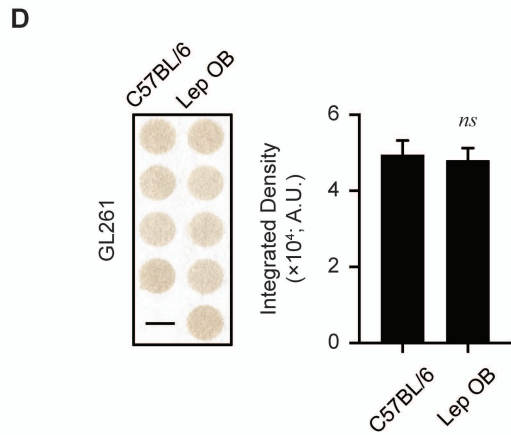

**Supplementary Figure 7.** *HFD Consumption Rather than Genetic Obesity Accelerates GBM and Attenuates H<sub>2</sub>S Synthesis.* (A, B) Representative assessments of body mass and fat compositional changes over time in the context of leptin knockout *versus* wild-type C57BL/6J genetics. (C) Kaplan-Meier survival analysis indicates that overall survival between GBM-bearing C57BL/6J and genetically obese LepOB mice was mathematically indistinguishable as determined by log-rank statistical analysis. Additionally, (D) intracerebral H<sub>2</sub>S synthesis remained intact in the context of genetic leptin knockout. Each well contains brain and tumor tissue homogenate from separate and distinct experimental animals. *p* values determined by unpaired t-test.
